# Supplementary material
Source: Springer Nature journal article supplement (https://www.springermedizin.de/resource/supplementary/12889_2010_2677_MOESM1_ESM.pdf/9487022)

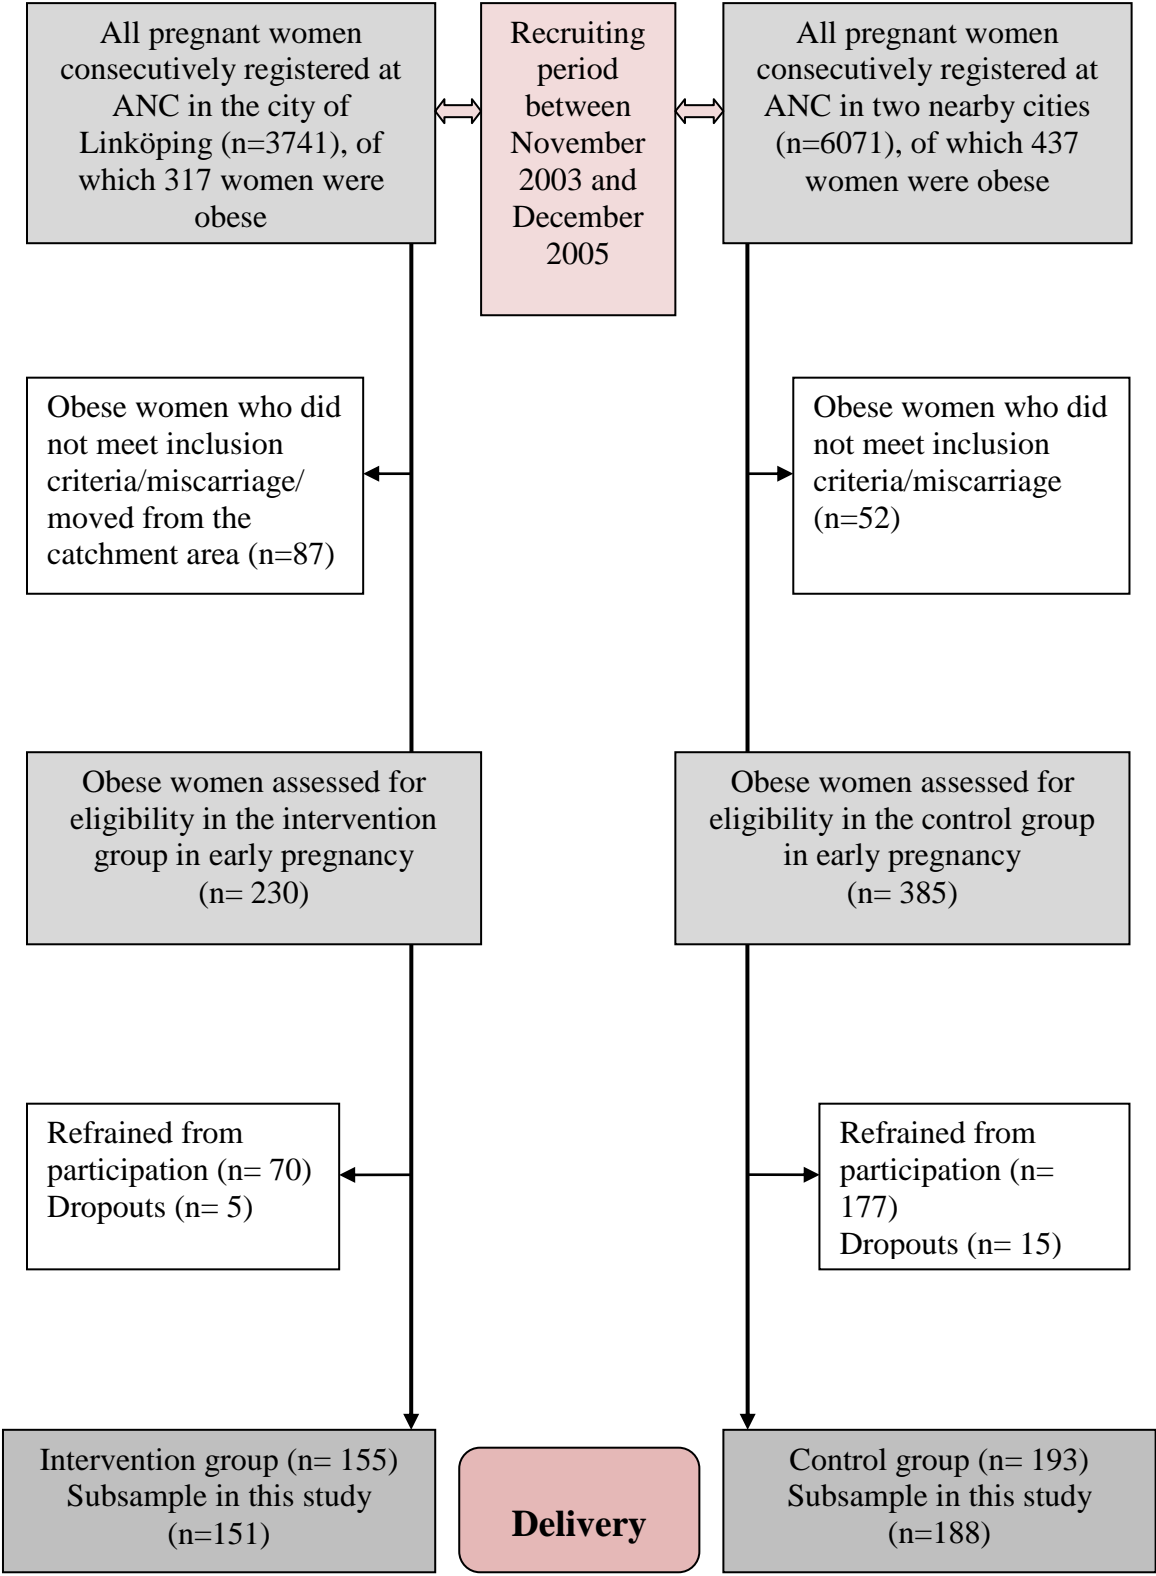

Supplement: MOESM1 [file 9487022]
